# Supplementary material for: Irisin mediates beiging of adipose-derived mesenchymal stem cells through binding to TRPC3
Source: PubMed Central journal article supplement (PMC9063202; doi:10.1186/s12915-022-01287-2), 2022-05-02
Supplement: 12915_2022_1287_MOESM6_ESM.pdf [file 12915_2022_1287_MOESM6_ESM.pdf]

| N  | Accession               | Name                                                          | Species | Peptides (95%) |
|----|-------------------------|---------------------------------------------------------------|---------|----------------|
| 1  | sp P35527 K1C9_HUMAN    | Keratin, type I cytoskeletal 9 OS=Homo sapiens GN=KRT9 PE=1   | HUMAN   | 2              |
| 2  | sp P13645 K1C10_HUMAN   | Keratin, type I cytoskeletal 10 OS=Homo sapiens GN=KRT10 PE=  | HUMAN   | 2              |
| 3  | sp Q13507-2 TRPC3_HUMAN | Isoform 2 of Short transient receptor potential channel 3 OS= | HUMAN   | 3              |
| 4  | sp P35908 K22E_HUMAN    | Isoform 2 of Short transient receptor potential channel 3 OS= | HUMAN   | 1              |
| 5  | tr Q9BZ22 Q9BZ22_HUMAN  | Isoform 2 of Short transient receptor potential channel 3 OS= | HUMAN   | 1              |
| 6  | tr D6RGX4 D6RGX4_HUMAN  | Protein FAM90A26P OS=Homo sapiens GN=FAM90A26P PE=4 SV=1      | HUMAN   | 1              |
| 7  | sp Q86YD7 F90A1_HUMAN   | Protein FAM90A1 OS=Homo sapiens GN=FAM90A1 PE=2 SV=3          | HUMAN   | 1              |
| 8  | sp Q658T7 F90A2_HUMAN   | Putative protein FAM90A2P OS=Homo sapiens GN=FAM90A2P PE=5    | HUMAN   | 1              |
| 9  | sp Q658T7-2 F90A2_HUMAN | Isoform 2 of Putative protein FAM90A2P OS=Homo sapiens GN=F   | HUMAN   | 1              |
| 10 | sp POC7X0 F90A0_HUMAN   | Putative protein FAM90A24P OS=Homo sapiens GN=FAM90A24P PE=   | HUMAN   | 1              |
| 11 | sp POC7W9 F90AE_HUMAN   | Putative protein FAM90A14P OS=Homo sapiens GN=FAM90A14P PE=   | HUMAN   | 1              |
| 12 | sp POC7W8 F90AD_HUMAN   | Putative protein FAM90A13P OS=Homo sapiens GN=FAM90A13P PE=   | HUMAN   | 1              |
| 13 | sp POC7V4 F90AJ_HUMAN   | Putative protein FAM90A15P OS=Homo sapiens GN=FAM90A15P PE=   | HUMAN   | 1              |
| 14 | sp A8MXZ1 F90AN_HUMAN   | Putative protein FAM90A23P OS=Homo sapiens GN=FAM90A23P PE=   | HUMAN   | 1              |
| 15 | sp A8MXJ8 F90A5_HUMAN   | Putative protein FAM90A5P OS=Homo sapiens GN=FAM90A5P PE=5    | HUMAN   | 1              |
| 16 | sp A8MX19 F90AC_HUMAN   | Putative protein FAM90A12P OS=Homo sapiens GN=FAM90A12P PE=   | HUMAN   | 1              |
| 17 | sp A8MWA6 F90AM_HUMAN   | Putative protein FAM90A22P OS=Homo sapiens GN=FAM90A22P PE=   | HUMAN   | 1              |
| 18 | sp A6NNJ1 F90A9_HUMAN   | Putative protein FAM90A9P OS=Homo sapiens GN=FAM90A9P PE=5    | HUMAN   | 1              |
| 19 | sp A6NKC0 F90A7_HUMAN   | Putative protein FAM90A7P OS=Homo sapiens GN=FAM90A7P PE=5    | HUMAN   | 1              |
| 20 | sp A6NJQ4 F90A8_HUMAN   | Putative protein FAM90A8P OS=Homo sapiens GN=FAM90A8P PE=5    | HUMAN   | 1              |
| 21 | sp A6NIJ5 F90AK_HUMAN   | Putative protein FAM90A20P OS=Homo sapiens GN=FAM90A20P PE=   | HUMAN   | 1              |
| 22 | sp A6NEW6 F90AG_HUMAN   | Putative protein FAM90A16P/FAM90A17P OS=Homo sapiens GN=FAM   | HUMAN   | 1              |
| 23 | sp A6NE21 F90AI_HUMAN   | Putative protein FAM90A18P/FAM90A19P OS=Homo sapiens GN=FAM   | HUMAN   | 1              |
| 24 | sp A6NDY2 F90AA_HUMAN   | Putative protein FAM90A10P OS=Homo sapiens GN=FAM90A10P PE=   | HUMAN   | 1              |
| 25 | sp Q9BQ51 PD1L2_HUMAN   | Programmed cell death 1 ligand 2 OS=Homo sapiens GN=PDCD1L    | HUMAN   | 1              |
| 26 | sp Q9BQ51-2 PD1L2_HUMAN | Isoform 2 of Programmed cell death 1 ligand 2 OS=Homo sapien  | HUMAN   | 1              |
| 27 | sp P40197 GPV_HUMAN     | Platelet glycoprotein V OS=Homo sapiens GN=GP5 PE=1 SV=1      | HUMAN   | 1              |
| 28 | tr B7Z8R6 B7Z8R6_HUMAN  | Trypstatin OS=Homo sapiens GN=AMBP PE=2 SV=1                  | HUMAN   | 1              |
| 29 | sp P02760 AMBP_HUMAN    | Protein AMBP OS=Homo sapiens GN=AMBP PE=1 SV=1                | HUMAN   | 1              |
| 30 | tr Q5JXX3 Q5JXX3_HUMAN  | Mortality factor 4 like 2 (Fragment) OS=Homo sapiens GN=MOR   | HUMAN   | 3              |
| 31 | tr HOYNX3 HOYNX3_HUMAN  | Mortality factor 4-like protein 1 (Fragment) OS=Homo sapien   | HUMAN   | 5              |
| 32 | tr HOYLJ3 HOYLJ3_HUMAN  | Mortality factor 4-like protein 1 OS=Homo sapiens GN=MORF4L   | HUMAN   | 4              |
| 33 | sp Q9UBU8-2 MO4L1_HUMAN | Isoform 2 of Mortality factor 4-like protein 1 OS=Homo sapi   | HUMAN   | 1              |
| 34 | sp Q15014 MO4L2_HUMAN   | Mortality factor 4-like protein 2 OS=Homo sapiens GN=MORF4L   | HUMAN   | 1              |

|                            |                                                                  |   |
|----------------------------|------------------------------------------------------------------|---|
| 35 sp P35527 K1C9_HUMAN    | Keratin, type I cytoskeletal 9 OS=Homo sapiens GN=KRT9 PE=1HUMAN | 3 |
| 36 sp Q9NS23 RASF1_HUMAN   | Ras association domain-containing protein 1 OS=Homo sapiensHUMAN | 1 |
| 37 sp Q9NS23-5 RASF1_HUMAN | Isoform E of Ras association domain-containing protein 1 OSHUMAN | 4 |
| 38 tr J3QLJ4 J3QLJ4_HUMAN  | Uncharacterized protein OS=Homo sapiens PE=4 SV=1 HUMAN          | 1 |
